# Supplementary material for: Determination of contaminants of emerging concern in raw pig manure as a whole: difference with the analysis of solid and liquid phases separately
Source: Royal Society of Chemistry journal article supplement (doi:10.1039/d2em00323f), 2022-01-01

## Electronic Supplementary Information

### **Determination of contaminants of emerging concern in raw pig manure as a whole. Difference with the analysis of solid and liquid phases separately.**

Cristina Portela-Monge<sup>a,b</sup>, Silvia Bolado<sup>b,c</sup>, Rebeca López-Serna<sup>a,b</sup>, Juan José Jiménez<sup>\*a,b</sup>

<sup>a</sup> Department of Analytical Chemistry, Faculty of Sciences, University of Valladolid, Campus Miguel Delibes, Paseo de Belén 7, 47011 Valladolid, Spain

<sup>b</sup> Institute of Sustainable Processes, Dr. Mergelina s/n, 47011 Valladolid, Spain

<sup>3</sup> Department of Chemical Engineering and Environmental Technology, School of Industrial Engineering, University of Valladolid, Dr. Mergelina, s/n, 47011 Valladolid, Spain

Supplementary data 1: List of target analytes, abbreviations, and their physicochemical properties (Source: Scifinder).

| Therapeutic class | Therapeutic subclass | Analytes              | MW <sup>1</sup><br>(amu) | Molecular formula                                               | Structure                                                                             | pKa <sup>2</sup> at 25°C                     | log <sup>3</sup> P at 25°C |
|-------------------|----------------------|-----------------------|--------------------------|-----------------------------------------------------------------|---------------------------------------------------------------------------------------|----------------------------------------------|----------------------------|
| Antibiotic        | β-lactams            | Amoxicillin (AMO)     | 365.4                    | C <sub>16</sub> H <sub>19</sub> N <sub>3</sub> O <sub>5</sub> S | 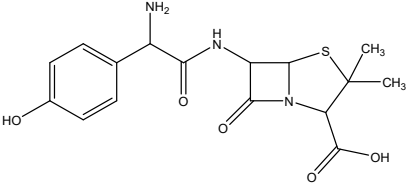   | Most Acidic:<br>2.44<br>Most Basic:<br>7.14  | 0.883                      |
|                   |                      | Penicillin G (PEN)    | 334.39                   | C <sub>16</sub> H <sub>18</sub> N <sub>2</sub> O <sub>4</sub> S |    | Most Acidic:<br>-1.32<br>Most Basic:<br>2.45 | 1.918                      |
|                   | Tetracyclines        | Doxycycline (DOX)     | 444.43                   | C <sub>22</sub> H <sub>24</sub> N <sub>2</sub> O <sub>8</sub>   |    | Most Acidic:<br>4.50<br>Most Basic:<br>10.84 | 1.777                      |
|                   |                      | Oxytetracycline (OTC) | 460.43                   | C <sub>22</sub> H <sub>24</sub> N <sub>2</sub> O <sub>9</sub>   |   | Most Acidic:<br>4.50<br>Most Basic:<br>10.80 | 0.479                      |
|                   |                      | Tetracycline (TTC)    | 444.43                   | C <sub>22</sub> H <sub>24</sub> N <sub>2</sub> O <sub>8</sub>   |  | Most Acidic:<br>4.50<br>Most Basic:<br>11.02 | 0.617                      |

Supplementary data 1, continued.

| Therapeutic class | Therapeutic subclass | Analytes                                       | MW <sup>1</sup> (amu) | Molecular formula                                              | Structure                                                                             | pKa <sup>2</sup> at 25°C              | log <sup>3</sup> P at 25°C |  |  |
|-------------------|----------------------|------------------------------------------------|-----------------------|----------------------------------------------------------------|---------------------------------------------------------------------------------------|---------------------------------------|----------------------------|--|--|
| Antibiotic        | Quinolones           | Nalidixic acid (AND)                           | 232.24                | C <sub>12</sub> H <sub>22</sub> N <sub>2</sub> O <sub>3</sub>  | 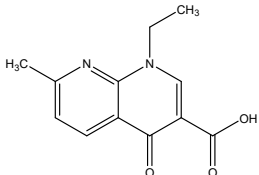   | Most Acidic: 3.45<br>Most Basic: 6.12 | 0.025                      |  |  |
|                   |                      | <b>Fluoroquinolones (quinolone subfamily):</b> |                       |                                                                |                                                                                       |                                       |                            |  |  |
|                   |                      | Ciprofloxacin (CIP)                            | 331.34                | C <sub>17</sub> H <sub>18</sub> FN <sub>3</sub> O <sub>3</sub> |    | Most Acidic: 6.43<br>Most Basic: 8.68 | 1.625                      |  |  |
|                   |                      | Danofloxacin (DAN)                             | 357.38                | C <sub>19</sub> H <sub>20</sub> FN <sub>3</sub> O <sub>3</sub> |    | Most Acidic: 6.43<br>Most Basic: 9.00 | 1.811                      |  |  |
|                   |                      | Enrofloxacin (ENR)                             | 359.39                | C <sub>19</sub> H <sub>22</sub> FN <sub>3</sub> O <sub>3</sub> |   | Most Acidic: 6.43<br>Most Basic: 7.76 | 2.306                      |  |  |
|                   |                      | Marbofloxacin (MAR)                            | 362.36                | C <sub>17</sub> H <sub>19</sub> FN <sub>4</sub> O <sub>4</sub> |  | Most Acidic: 6.02<br>Most Basic: 7.34 | -0.641                     |  |  |

Supplementary data 1, continued.

| Therapeutic class | Therapeutic subclass | Analytes            | MW <sup>1</sup> (amu) | Molecular formula                                               | Structure                                                                           | pKa <sup>2</sup> at 25°C                    | log <sup>3</sup> P at 25°C |
|-------------------|----------------------|---------------------|-----------------------|-----------------------------------------------------------------|-------------------------------------------------------------------------------------|---------------------------------------------|----------------------------|
| Antibiotic        | Quinolones           | Norflloxacin (NOR)  | 319.33                | C <sub>16</sub> H <sub>18</sub> FN <sub>3</sub> O <sub>3</sub>  | 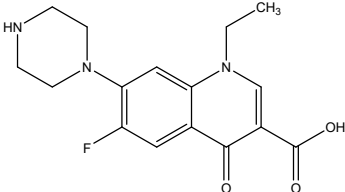 | Most Acidic:<br>0.16<br>Most Basic:<br>8.68 | 1.744                      |
|                   | Sulfonamides         | Sulfadimidine (SDD) | 278.33                | C <sub>12</sub> H <sub>14</sub> N <sub>4</sub> O <sub>2</sub> S |  | Most Acidic:<br>1.69<br>Most Basic:<br>7.89 | 0.296                      |
|                   |                      | Sulfadiazine (SDZ)  | 250.28                | C <sub>10</sub> H <sub>10</sub> N <sub>4</sub> O <sub>2</sub> S |  | Most Acidic:<br>1.00<br>Most Basic:<br>6.81 | -0.074                     |

Supplementary data 1, continued.

| Therapeutic class | Therapeutic subclass | Analytes               | MW <sup>1</sup> (amu) | Molecular formula                                                           | Structure                                                                             | pKa <sup>2</sup> at 25°C                    | log <sup>3</sup> P at 25°C |
|-------------------|----------------------|------------------------|-----------------------|-----------------------------------------------------------------------------|---------------------------------------------------------------------------------------|---------------------------------------------|----------------------------|
| Antibiotic        | Sulfonamides         | Sulfamethoxazole (SMX) | 253.28                | C <sub>10</sub> H <sub>11</sub> N <sub>3</sub> O <sub>3</sub> S             | 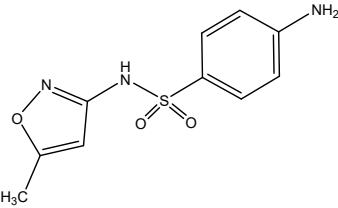   | Most Acidic:<br>1.39<br>Most Basic:<br>5.81 | 0.659                      |
|                   |                      | Sulfamethizole (SMZ)   | 270.33                | C <sub>9</sub> H <sub>10</sub> N <sub>4</sub> O <sub>2</sub> S <sub>2</sub> |    | Most Acidic:<br>2.07<br>Most Basic:<br>5.51 | 0.52                       |
|                   |                      | Sulfathiazole (STZ)    | 255.32                | C <sub>9</sub> H <sub>9</sub> N <sub>3</sub> O <sub>2</sub> S <sub>2</sub>  |    | Most Acidic:<br>2.19<br>Most Basic:<br>7.24 | 0.05                       |
|                   |                      | Sulfapyridine (SPD)    | 249.29                | C <sub>11</sub> H <sub>11</sub> N <sub>3</sub> O <sub>2</sub> S             |  | Most Acidic:<br>2.13<br>Most Basic:<br>8.54 | 0.469                      |

Supplementary data 1, continued.

| Therapeutic class | Therapeutic subclass | Analytes           | MW <sup>1</sup> (amu) | Molecular formula                                | Structure                                                                            | pKa <sup>2</sup> at 25°C                     | log <sup>3</sup> P at 25°C |
|-------------------|----------------------|--------------------|-----------------------|--------------------------------------------------|--------------------------------------------------------------------------------------|----------------------------------------------|----------------------------|
| Antibiotic        | Macrolides           | Erythromycin (ERY) | 733.93                | C <sub>37</sub> H <sub>67</sub> NO <sub>13</sub> | 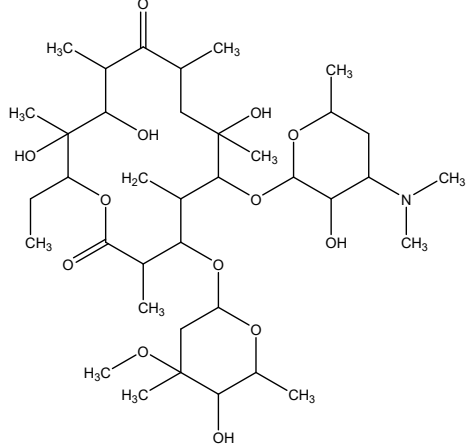  | Most Acidic:<br>8.16<br>Most Basic:<br>13.09 | 1.909                      |
|                   |                      | Tylosin (TYL)      | 916.1                 | C <sub>46</sub> H <sub>77</sub> NO <sub>17</sub> |  | Most Acidic:<br>7.39<br>Most Basic:<br>13.06 | 0.628                      |

Supplementary data 1, continued.

| Therapeutic class | Therapeutic subclass | Analytes             | MW <sup>1</sup> (amu) | Molecular formula                                 | Structure | pKa <sup>2</sup> at 25°C                     | log <sup>3</sup> P at 25°C |
|-------------------|----------------------|----------------------|-----------------------|---------------------------------------------------|-----------|----------------------------------------------|----------------------------|
| Antibiotic        | Macrolides           | Clarithromycin (CTM) | 747.95                | C <sub>38</sub> H <sub>69</sub> NO <sub>13</sub>  |           | Most Acidic:<br>8.16<br>Most Basic:<br>13.08 | 2.805                      |
|                   | Pleuromutilins       | Tiamulin (TIA)       | 493.74                | C <sub>28</sub> H <sub>47</sub> NO <sub>4</sub> S |           | Most Acidic:<br>9.74<br>Most Basic:<br>14.65 | 4.38                       |

Supplementary data 1, continued.

| Therapeutic class   | Therapeutic subclass              | Analytes           | MW <sup>1</sup> (amu) | Molecular formula                                                  | Structure                                                                             | pKa <sup>2</sup> at 25°C                                                              | log <sup>3</sup> p at 25°C |
|---------------------|-----------------------------------|--------------------|-----------------------|--------------------------------------------------------------------|---------------------------------------------------------------------------------------|---------------------------------------------------------------------------------------|----------------------------|
| Antibiotic          | Aminoglycosides                   | Apramycin (APR)    | 539.58                | C <sub>21</sub> H <sub>41</sub> N <sub>5</sub> O <sub>11</sub>     | 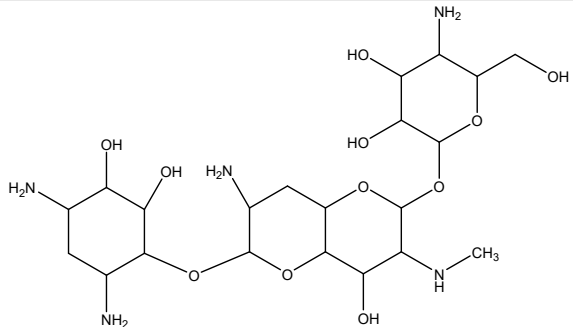   | Most Acidic:<br>9.48<br>Most Basic:<br>12.91                                          | -3.427                     |
|                     | Phenicols                         | Florphenicol (FLO) | 358.21                | C <sub>12</sub> H <sub>14</sub> Cl <sub>2</sub> FNO <sub>4</sub> S |    | Most Acidic:<br>1.79<br>Most Basic:<br>10.73                                          | 1.175                      |
|                     | Diamino-pyrimidines               | Trimethoprim (TMP) | 290.32                | C <sub>14</sub> H <sub>18</sub> N <sub>4</sub> O <sub>3</sub>      |   | Most Acidic:<br>7.04 ±0.10                                                            | 0.594                      |
|                     | Antimicrobials/<br>Antiprotozoals | Triclosan (TCS)    |                       | 289.54                                                             | C <sub>12</sub> H <sub>7</sub> Cl <sub>3</sub> O <sub>2</sub>                         |  | Most Acidic:<br>7.80       |
| Metronidazole (MTN) |                                   |                    | 171.15                | C <sub>6</sub> H <sub>9</sub> N <sub>3</sub> O <sub>3</sub>        |  | Most Acidic:<br>2.58<br>Most Basic:<br>14.44                                          | -0.135                     |



Supplementary data 1, continued.

| Therapeutic class               | Therapeutic subclass                         | Analytes                              | MW <sup>1</sup> (amu) | Molecular formula                                               | Structure                                                                             | pKa <sup>2</sup> at 25°C               | log <sup>3</sup> p at 25°C |  |  |
|---------------------------------|----------------------------------------------|---------------------------------------|-----------------------|-----------------------------------------------------------------|---------------------------------------------------------------------------------------|----------------------------------------|----------------------------|--|--|
| Analgesics/ Anti-inflammatories | Analgesics                                   | Acetaminophen (AAF)                   | 151.16                | C <sub>8</sub> H <sub>9</sub> NO <sub>2</sub>                   | 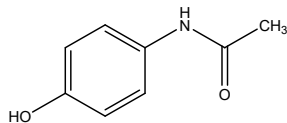   | Most Acidic: 1.72<br>Most Basic: 9.86  | 0.475                      |  |  |
|                                 | NSAIDs (Nonsteroidal anti-inflammatory drug) | Diclofenac (DCF)                      | 296.15                | C <sub>14</sub> H <sub>11</sub> Cl <sub>2</sub> NO <sub>2</sub> |    | Most Acidic: -2.26<br>Most Basic: 4.18 | 4.548                      |  |  |
|                                 |                                              | Ibuprofen (IBP)                       | 206.28                | C <sub>13</sub> H <sub>18</sub> O <sub>2</sub>                  |    | Most Acidic: 4.41                      | 3.502                      |  |  |
|                                 |                                              | Naproxen (NPX)                        | 230.26                | C <sub>14</sub> H <sub>14</sub> O <sub>3</sub>                  |   | Most Acidic: 4.84                      | 2.876                      |  |  |
|                                 |                                              | <b>Salicylates (NSAID subfamily):</b> |                       |                                                                 |                                                                                       |                                        |                            |  |  |
|                                 |                                              | Acetylsalicylic acid (AAS)            | 180.16                | C <sub>9</sub> H <sub>8</sub> O <sub>4</sub>                    |  | Most Acidic: 3.48                      | 1.399                      |  |  |

Supplementary data 1, continued.

| Therapeutic class               | Therapeutic subclass                         | Analytes             | MW <sup>1</sup> (amu) | Molecular formula                                | Structure                                                                            | pKa <sup>2</sup> at 25°C | log <sup>3</sup> p at 25°C |
|---------------------------------|----------------------------------------------|----------------------|-----------------------|--------------------------------------------------|--------------------------------------------------------------------------------------|--------------------------|----------------------------|
| Analgesics/ Anti-inflammatories | NSAIDs (Nonsteroidal anti-inflammatory drug) | Salicylic acid (ASC) | 138.12                | C <sub>7</sub> H <sub>6</sub> O <sub>3</sub>     | 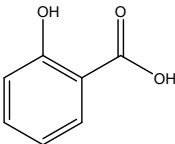  | Most Acidic: 3.01        | 2.011                      |
|                                 | Corticoesteroid                              | Dexamethasone (DEX)  | 392.46                | C <sub>22</sub> H <sub>29</sub> FO <sub>5</sub>  |   | Most Acidic: 12.13       | 2.033                      |
| Lipid regulators                | Active substance of fibrates                 | Clofibric acid (ACF) | 214.65                | C <sub>10</sub> H <sub>11</sub> ClO <sub>3</sub> |   | Most Acidic: 3.18        | 2.425                      |
|                                 | Fibrates                                     | Gemfibrozil (GEM)    | 250.33                | C <sub>15</sub> H <sub>22</sub> O <sub>3</sub>   |  | Most Acidic: 4.75        | 4.302                      |

Supplementary data 1, continued.

| Therapeutic class                   | Therapeutic subclass | Analytes            | MW <sup>1</sup> (amu) | Molecular formula                                              | Structure                                                                            | pKa <sup>2</sup> at 25°C                      | log <sup>3</sup> P at 25°C |
|-------------------------------------|----------------------|---------------------|-----------------------|----------------------------------------------------------------|--------------------------------------------------------------------------------------|-----------------------------------------------|----------------------------|
| Lipid regulators                    | Statins              | Atorvastatin (ATV)  | 558.64                | C <sub>33</sub> H <sub>35</sub> FN <sub>2</sub> O <sub>5</sub> | 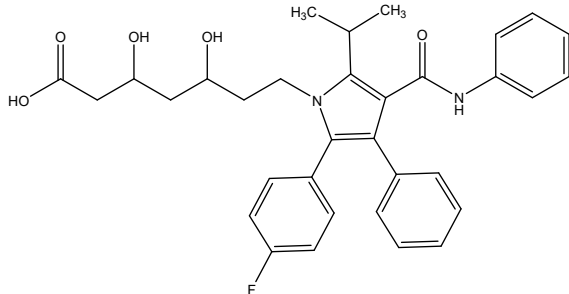  | Most Acidic:<br>0.38<br>Most Basic:<br>4.29   | 3.846                      |
| Psychiatric drugs / anticonvulsants |                      | Carbamazepine (CBM) | 236.27                | C <sub>15</sub> H <sub>12</sub> N <sub>2</sub> O               |   | Most Acidic:<br>-0.49<br>Most Basic:<br>13.94 | 1.895                      |
| Hormones                            | Natural hormones     | Progesterone (PGT)  | 341.46                | C <sub>21</sub> H <sub>30</sub> O <sub>2</sub>                 |  |                                               | 3.827                      |

Supplementary data 1, continued.

| Therapeutic class | Therapeutic subclass | Analytes                    | MW <sup>1</sup> (amu) | Molecular formula                                             | Structure                                                                             | pKa <sup>2</sup> at 25°C               | log <sup>3</sup> P at 25°C |
|-------------------|----------------------|-----------------------------|-----------------------|---------------------------------------------------------------|---------------------------------------------------------------------------------------|----------------------------------------|----------------------------|
| Hormones          | Natural hormones     | Estrone (E1)                | 270.37                | C <sub>18</sub> H <sub>22</sub> O <sub>2</sub>                | 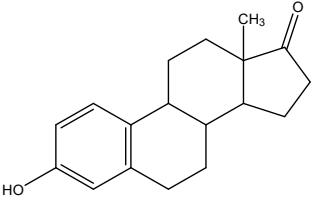   | Most Acidic: 10.25                     | 3.624                      |
|                   |                      | 17-β-estradiol (E2)         | 272.38                | C <sub>18</sub> H <sub>24</sub> O <sub>2</sub>                |    | Most Acidic: 10.27                     | 4.146                      |
|                   | Synthetic hormones   | 17-α-ethinylestradiol (EE2) | 296.4                 | C <sub>20</sub> H <sub>24</sub> O <sub>2</sub>                |    | Most Acidic: 10.24                     | 4.106                      |
| β-blockers        | Cardiovascular drugs | Atenolol (ATN)              | 266.34                | C <sub>14</sub> H <sub>22</sub> N <sub>2</sub> O <sub>3</sub> |   | Most Acidic: 9.43<br>Most Basic: 13.88 | 0.335                      |
|                   |                      | Propranolol (PPN)           | 259.34                | C <sub>16</sub> H <sub>21</sub> NO <sub>2</sub>               |  | Most Acidic: 9.50<br>Most Basic: 13.84 | 2.9                        |

## Supplementary data 1, continued.

| Therapeutic class           | Therapeutic subclass | Analytes                          | MW <sup>1</sup> (amu) | Molecular formula                                                            | Structure                                                                             | pKa <sup>2</sup> at 25°C                      | log <sup>3</sup> p at 25°C |
|-----------------------------|----------------------|-----------------------------------|-----------------------|------------------------------------------------------------------------------|---------------------------------------------------------------------------------------|-----------------------------------------------|----------------------------|
| Radiological contrast agent |                      | Iohexol (IOH)                     | 821.14                | C <sub>19</sub> H <sub>26</sub> I <sub>3</sub> N <sub>3</sub> O <sub>9</sub> | 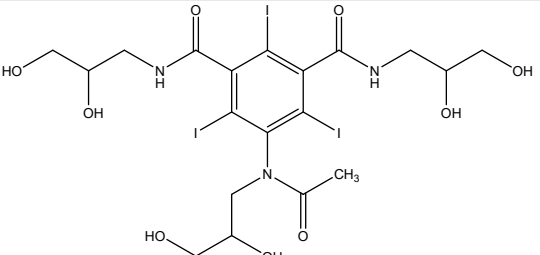   | Most Acidic:<br>-2.72<br>Most Basic:<br>11.35 | -2.921                     |
| Stimulants                  |                      | Caffeine (CAF)                    | 194.19                | C <sub>8</sub> H <sub>10</sub> N <sub>4</sub> O <sub>2</sub>                 |    | Most Basic:<br>0.52                           | -0.628                     |
| Anti-parasitics             | Benzimidazoles       | Fenbendazole (FEN)                | 299.35                | C <sub>15</sub> H <sub>13</sub> N <sub>3</sub> O <sub>2</sub> S              |    | Most Acidic:<br>5.25<br>Most Basic:<br>10.80  | 2.364                      |
|                             |                      | Crotamiton (CRT)                  | 203.28                | C <sub>13</sub> H <sub>17</sub> NO                                           |   | Most Basic:<br>1.14                           | 2.464                      |
| Insect repellent            |                      | N,N-diethyl-meta-toluamide (DEET) | 191.27                | C <sub>12</sub> H <sub>17</sub> NO                                           |  | Most Basic:<br>-1.37                          | 2.419                      |

Supplementary data 1, continued.

| Therapeutic class | Therapeutic subclass | Analytes                 | MW <sup>1</sup> (amu) | Molecular formula                               | Structure                                                                             | pKa <sup>2</sup> at 25°C | log <sup>3</sup> P at 25°C |
|-------------------|----------------------|--------------------------|-----------------------|-------------------------------------------------|---------------------------------------------------------------------------------------|--------------------------|----------------------------|
| Herbicide         |                      | Atrazine (ATZ)           | 215.68                | C <sub>8</sub> H <sub>14</sub> ClN <sub>5</sub> | 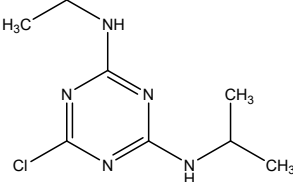   | Most Basic:<br>2.27      | 2.636                      |
| Preservatives     | Parabens             | Ethylparaben (EPR)       | 166.17                | C <sub>9</sub> H <sub>10</sub> O <sub>3</sub>   |    | Most Acidic:<br>8.31     | 2.391                      |
|                   |                      | Methylparaben (MPR)      | 152.15                | C <sub>8</sub> H <sub>8</sub> O <sub>3</sub>    |    | Most Acidic:<br>8.31     | 1.882                      |
|                   |                      | Propylparaben (PPR)      | 180.2                 | C <sub>10</sub> H <sub>12</sub> O <sub>3</sub>  |   | Most Acidic:<br>8.23     | 2.901                      |
| Surfactants       | Alkylphenols         | 4-nonylphenol (NNF)      | 220.35                | C <sub>15</sub> H <sub>24</sub> O               |  | Most Acidic:<br>10.15    | 6.142                      |
|                   |                      | 4-tert-octylphenol (TOP) | 206.32                | C <sub>14</sub> H <sub>22</sub> O               |  | Most Acidic:<br>10.15    | 5.18                       |

Supplementary data 1, continued.

| Therapeutic class | Therapeutic subclass | Analytes                    | MW <sup>1</sup> (amu) | Molecular formula                              | Structure                                                                           | pKa <sup>2</sup> at 25°C | log <sup>3</sup> P at 25°C |
|-------------------|----------------------|-----------------------------|-----------------------|------------------------------------------------|-------------------------------------------------------------------------------------|--------------------------|----------------------------|
| Plasticizers      |                      | Bisphenol A (BPA)           | 228.29                | C <sub>15</sub> H <sub>16</sub> O <sub>2</sub> | 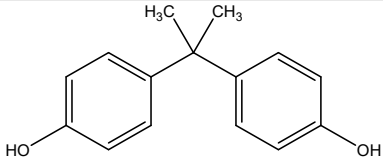 | Most Acidic:<br>10.29    | 3.641                      |
| Other compounds   | p-quinones           | 1,4-Benzoquinone (BZQ)      | 108.09                | C <sub>6</sub> H <sub>4</sub> O <sub>2</sub>   |  |                          | 0.394                      |
|                   |                      | 4-hydroxybenzoic acid (AHB) | 138.12                | C <sub>7</sub> H <sub>6</sub> O <sub>3</sub>   |  | Most Acidic:<br>4.57     | 1.401                      |

<sup>1</sup>MW: Molecular Weight; <sup>2</sup>Ka: Acidity constant; <sup>3</sup>P: Partition coefficient

Supplementary data 2: Sample preparation process scheme.

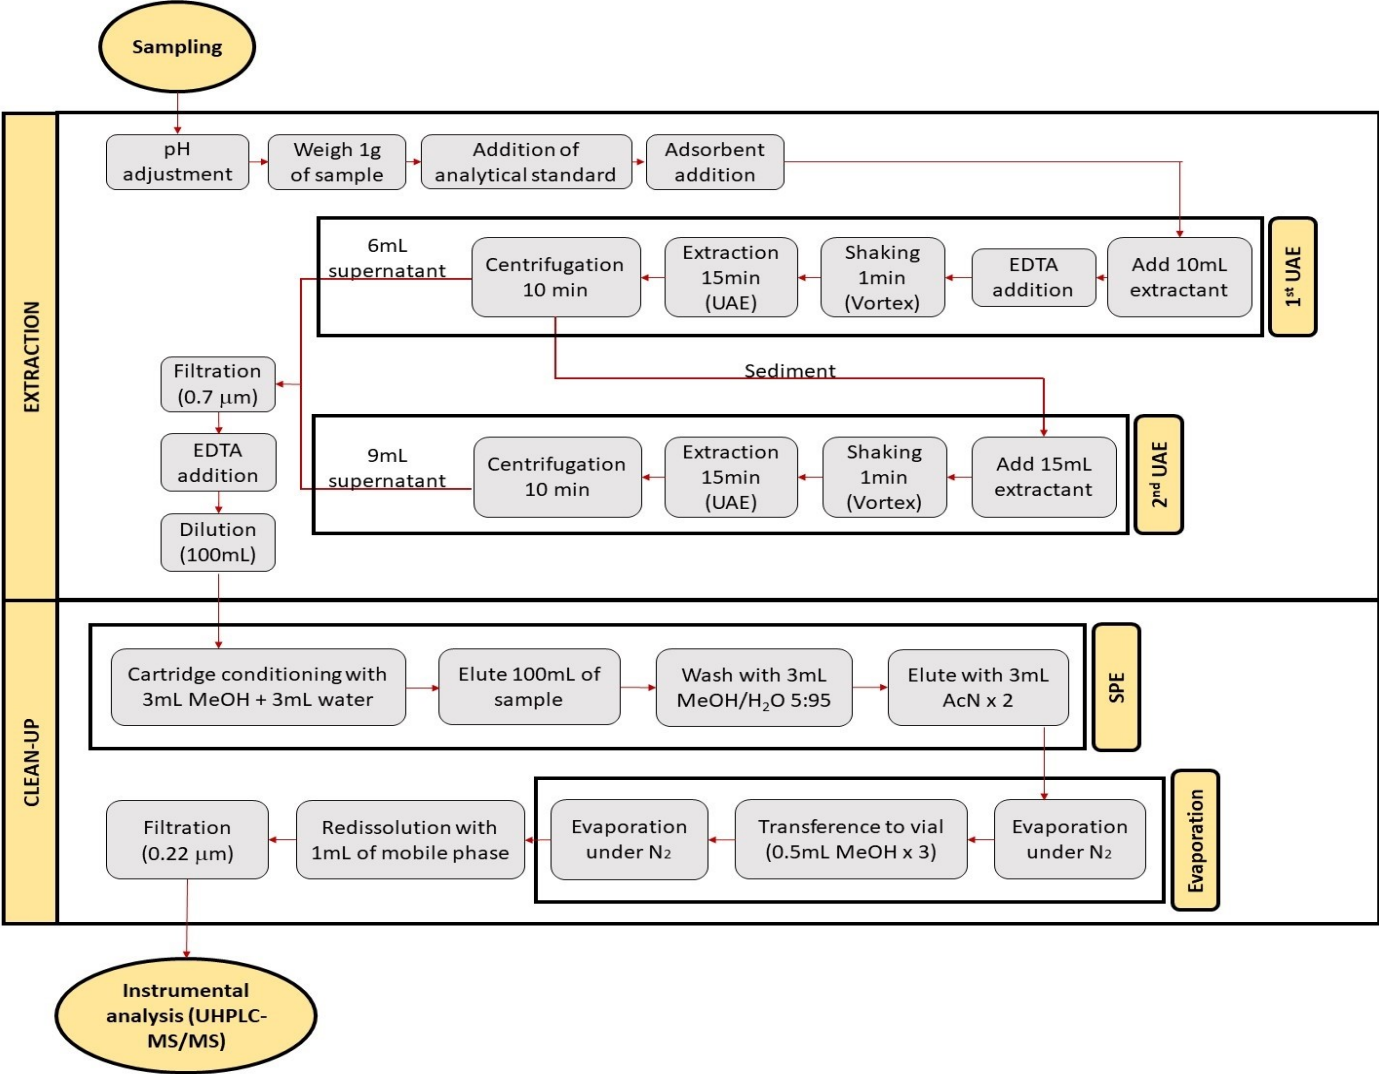



**Supplementary data 3: SRMs and mass spectrometry instrumental conditions for the target analytes. Declustering potential (DP), collision energy (CE), and collision cell exit potential (CXP). The entrance potential (EP) voltage for initial ion collimation has hold at 10V and the observation time for each transition is 7 ms.**

| RT (min) | Analytes     | Q1 (m/z) | Q3 (m/z) | DP (volts) | CE (volts) | CXP (volts) |
|----------|--------------|----------|----------|------------|------------|-------------|
| 0.52     | <b>ATN 1</b> | 267.1    | 145.1    | 11         | 33         | 24          |
|          | ATN 2        | 267.1    | 190.3    | 11         | 29         | 4           |
| 0.54     | <b>AMO 1</b> | 365.9    | 348.9    | 26         | 13         | 28          |
|          | AMO 2        | 365.9    | 114.0    | 26         | 29         | 12          |
| 0.72     | <b>MTN 1</b> | 172.0    | 128.0    | 41         | 21         | 6           |
|          | MTN 2        | 172.0    | 82.0     | 41         | 35         | 14          |
| 0.72     | <b>IOH 1</b> | 821.8    | 804.0    | 126        | 33         | 26          |
|          | IOH 2        | 821.8    | 602.8    | 126        | 43         | 46          |
| 0.83     | <b>AAF 1</b> | 152.0    | 110.0    | 61         | 23         | 16          |
|          | AAF 2        | 152.0    | 108.9    | 61         | 55         | 14          |
| 1.05     | <b>SDZ 1</b> | 251.0    | 155.9    | 71         | 23         | 20          |
|          | SDZ 2        | 251.0    | 108.0    | 71         | 31         | 12          |
| 1.35     | <b>STZ 1</b> | 256.0    | 155.9    | 96         | 21         | 8           |
|          | STZ 2        | 256.0    | 108.1    | 96         | 33         | 12          |
| 1.42     | <b>SPD 1</b> | 250.1    | 156.1    | 61         | 23         | 10          |
|          | SPD 2        | 250.1    | 108.1    | 61         | 35         | 12          |
| 1.64     | <b>TMP 1</b> | 291.0    | 230.1    | 51         | 33         | 18          |
|          | TMP 2        | 291.0    | 261.1    | 51         | 35         | 16          |
| 2.22     | <b>MAR 1</b> | 362.9    | 320.1    | 66         | 23         | 24          |
|          | MAR 2        | 362.9    | 326.7    | 66         | 25         | 24          |
| 2.73     | <b>TTC 1</b> | 445.0    | 410.0    | 51         | 27         | 32          |
|          | TTC 2        | 445.0    | 427.1    | 51         | 19         | 32          |
| 2.90     | <b>OTC 1</b> | 461.0    | 426.1    | 151        | 27         | 30          |
|          | OTC 2        | 461.0    | 442.9    | 151        | 19         | 32          |
| 3.03     | <b>SMZ 1</b> | 270.9    | 156.0    | 31         | 21         | 10          |
|          | SMZ 2        | 270.9    | 108.1    | 31         | 35         | 12          |
| 3.04     | <b>APR 1</b> | 271.0    | 156.0    | 50         | 20         | 19          |
|          | APR 2        | 271.0    | 180.0    | 50         | 40         | 19          |
| 3.06     | <b>CAF 1</b> | 195.0    | 137.9    | 71         | 27         | 18          |
|          | CAF 2        | 195.0    | 110.0    | 71         | 31         | 16          |
| 3.19     | <b>SDD 1</b> | 279.0    | 186.0    | 86         | 25         | 22          |
|          | SDD 2        | 279.0    | 124.1    | 86         | 33         | 6           |
| 3.31     | <b>NOR 1</b> | 320.1    | 276.2    | 96         | 27         | 18          |
|          | NOR 2        | 320.1    | 233.1    | 96         | 37         | 16          |
| 3.55     | <b>CIP 1</b> | 332.0    | 313.9    | 31         | 29         | 38          |
|          | CIP 2        | 332.0    | 231.1    | 31         | 57         | 16          |

Supplementary data 3, continued.

| RT (min) | Analytes      | Q1 (m/z) | Q3 (m/z) | DP (volts) | CE (volts) | CXP (volts) |
|----------|---------------|----------|----------|------------|------------|-------------|
| 3.66     | <b>SMX 1</b>  | 254.0    | 156.0    | 66         | 23         | 24          |
|          | SMX 2         | 254.0    | 108.0    | 66         | 33         | 16          |
| 3.68     | <b>FLO 1</b>  | 357.8    | 339.9    | 66         | 13         | 24          |
|          | FLO 2         | 357.8    | 241.0    | 66         | 25         | 14          |
| 3.73     | <b>DAN 1</b>  | 358.0    | 340.1    | 86         | 33         | 24          |
|          | DAN 2         | 358.0    | 314.1    | 86         | 27         | 38          |
| 3.73     | <b>ENR 1</b>  | 360.0    | 316.0    | 91         | 29         | 38          |
|          | ENR 2         | 360.0    | 341.9    | 91         | 33         | 38          |
| 3.94     | <b>AHB 1</b>  | 136.8    | 92.8     | -5         | -16        | -15         |
|          | AHB 2         | 136.8    | 64.9     | -5         | -40        | -13         |
| 3.96     | <b>ASC 1</b>  | 136.9    | 93.0     | -40        | -22        | -15         |
|          | ASC 2         | 136.9    | 94.7     | -40        | -38        | -33         |
| 4.06     | <b>MPR 1</b>  | 153.0    | 120.9    | 66         | 21         | 14          |
|          | MPR 2         | 153.0    | 108.9    | 66         | 15         | 30          |
| 4.09     | <b>PPN 1</b>  | 260.1    | 183.1    | 66         | 25         | 12          |
|          | PPN 2         | 260.1    | 116.1    | 66         | 25         | 8           |
| 4.11     | <b>DOX 1</b>  | 445.0    | 427.9    | 111        | 27         | 34          |
|          | DOX 2         | 445.0    | 410.1    | 111        | 37         | 36          |
| 4.13     | <b>PEN 1</b>  | 334.9    | 160.0    | 111        | 23         | 18          |
|          | PEN 2         | 334.9    | 176.0    | 111        | 19         | 16          |
| 4.19     | <b>BPA 1</b>  | 227.0    | 227.1    | -60        | -14        | -15         |
|          | BPA 2         | 227.0    | 211.1    | -60        | -26        | -13         |
| 4.37     | <b>TIA 1</b>  | 494.1    | 192.2    | 51         | 29         | 10          |
|          | TIA 2         | 494.1    | 119.0    | 51         | 59         | 12          |
| 4.43     | <b>ERY 1</b>  | 734.2    | 576.1    | 46         | 25         | 36          |
|          | ERY 2         | 734.2    | 157.8    | 46         | 37         | 22          |
| 4.46     | <b>TYL 1</b>  | 916.2    | 772.3    | 156        | 43         | 36          |
|          | TYL 2         | 916.2    | 174.1    | 156        | 51         | 10          |
| 4.47     | <b>EPR 1</b>  | 165.0    | 136.9    | -35        | -20        | -11         |
|          | EPR 2         | 165.0    | 136.0    | -35        | -20        | -13         |
| 4.51     | <b>AND 1</b>  | 233.1    | 187.1    | 21         | 37         | 18          |
|          | AND 2         | 233.1    | 159.0    | 21         | 45         | 18          |
| 4.57     | <b>CTM 1</b>  | 748.3    | 590.2    | 96         | 25         | 40          |
|          | CTM 2         | 748.3    | 157.9    | 96         | 41         | 26          |
| 4.59     | <b>CBM 1</b>  | 237.0    | 194.2    | 66         | 29         | 12          |
|          | CBM 2         | 237.0    | 193.2    | 66         | 47         | 6           |
| 4.68     | <b>ATZ 1</b>  | 216.0    | 173.9    | 71         | 25         | 22          |
|          | ATZ 2         | 216.0    | 103.9    | 71         | 41         | 16          |
| 4.70     | <b>DEET 1</b> | 192.1    | 119.3    | 56         | 23         | 10          |
|          | DEET 2        | 192.1    | 90.9     | 56         | 41         | 10          |

Supplementary data 3, continued.

| RT (min) | Analytes | Q1 (m/z) | Q3 (m/z) | DP (volts) | CE (volts) | CXP (volts) |
|----------|----------|----------|----------|------------|------------|-------------|
| 4.71     | PPR 1    | 178.9    | 137.1    | -60        | -20        | -13         |
|          | PPR 2    | 178.9    | 136.1    | -60        | -24        | -7          |
| 4.75     | DEX 1    | 392.9    | 355.1    | 41         | 19         | 20          |
|          | DEX 2    | 392.9    | 147.0    | 41         | 39         | 10          |
| 4.81     | ACF 1    | 212.9    | 127.1    | -35        | -24        | -15         |
|          | ACF 2    | 212.9    | 85.0     | -35        | -14        | -9          |
| 4.83     | FEN 1    | 300.0    | 268.1    | 96         | 29         | 22          |
|          | FEN 2    | 300.0    | 159.0    | 96         | 49         | 10          |
| 4.84     | NPX 1    | 231.1    | 185.1    | 56         | 21         | 12          |
|          | NPX 2    | 231.1    | 170.0    | 56         | 37         | 10          |
| 4.86     | CRT 1    | 204.1    | 69.0     | 61         | 35         | 12          |
|          | CRT 2    | 204.1    | 136.0    | 61         | 27         | 14          |
| 4.90     | E1 1     | 271.1    | 253.3    | 101        | 19         | 10          |
|          | E1 2     | 271.1    | 133.1    | 101        | 35         | 12          |
| 4.90     | E2 1     | 273.0    | 255.0    | 46         | 17         | 14          |
|          | E2 2     | 273.1    | 107.0    | 61         | 41         | 14          |
| 4.93     | EE2 1    | 297.1    | 107.0    | 81         | 33         | 12          |
|          | EE2 2    | 297.1    | 77.1     | 71         | 79         | 10          |
| 4.95     | TOP 1    | 205.0    | 205.1    | -200       | -14        | -19         |
|          | TOP 2    | 205.0    | 148.0    | -200       | -26        | -7          |
| 5.04     | ATV 1    | 559.2    | 440.2    | 26         | 33         | 38          |
|          | ATV 2    | 559.2    | 250.1    | 26         | 59         | 18          |
| 5.09     | DCF 1    | 293.9    | 250.0    | -10        | -18        | -7          |
|          | DCF 2    | 293.9    | 214.1    | -10        | -28        | -9          |
| 5.10     | IBP 1    | 205.0    | 159.1    | -35        | -10        | -15         |
|          | IBP 2    | 205.0    | 160.9    | -35        | -12        | -21         |
| 5.13     | PGT 1    | 315.1    | 109.0    | 141        | 31         | 10          |
|          | PGT 2    | 315.1    | 297.2    | 141        | 23         | 28          |
| 5.13     | BZQ 1    | 109.0    | 80.9     | 121        | 19         | 4           |
|          | BZQ 2    | 109.0    | 53.3     | 121        | 29         | 12          |
| 5.22     | GEM 1    | 249.0    | 121.0    | -5         | -30        | -7          |
|          | GEM 2    | 249.0    | 127.0    | -85        | -14        | -5          |
| 5.24     | TCS 1    | 286.8    | 286.9    | -90        | -6         | -17         |
|          | TCS 2    | 286.8    | 141.8    | -90        | -48        | -15         |
| 5.62     | NNF 1    | 219.1    | 132.9    | -65        | -42        | -7          |
|          | NNF 2    | 219.1    | 117.0    | -65        | -80        | -13         |
| 5.66     | AAS 1    | 181.1    | 160.9    | 71         | 17         | 14          |
|          | AAS 2    | 181.1    | 125.1    | 71         | 19         | 16          |



Supplementary data 4: Preliminary experiments to select the most suitable adsorbent according to the highest mean value of peak areas (n=7). Sample preparation conditions are those described in section 2.3, modifying only the type of adsorbent; spiking with 1000 ng g<sup>-1</sup> of each CEC.

| Analytes | p-value* | Mean value of peak areas ** |                  |               |
|----------|----------|-----------------------------|------------------|---------------|
|          |          | ODS                         | Alumina          | Alumina + ODS |
| PEN      | 0.0023   | 1579650                     | <u>2614833</u>   | 1010950       |
| OTC      | 0.0012   | <u>9368500</u>              | 5133167          | 2160550       |
| DOX      | 0.025    | <u>79936667</u>             | <u>66115000</u>  | 53893333      |
| TTC      | 0.021    | <u>6169000</u>              | <u>5013167</u>   | 4073333       |
| MAR      | 0.00026  | <u>12992667</u>             | <u>10731333</u>  | 4969000       |
| ENR      | <0.0001  | 13819833                    | <u>28428333</u>  | 6588000       |
| DAN      | <0.0001  | <u>24601667</u>             | <u>19815000</u>  | 8262833       |
| SDZ      | <0.0001  | <u>20950000</u>             | 16571667         | 7832833       |
| STZ      | <0.0001  | <u>76271667</u>             | <u>64583333</u>  | 31960000      |
| SMZ      | <0.0001  | <u>77346667</u>             | <u>65641667</u>  | 29150000      |
| SDD      | 0.0011   | <u>108893333</u>            | <u>104366667</u> | 63071667      |
| SMX      | <0.0001  | <u>73266667</u>             | 56526667         | 37323333      |
| TYL      | <0.0001  | 644330                      | <u>25213333</u>  | 674383        |
| TIA      | <0.0001  | 11716667                    | <u>253616667</u> | 15633167      |
| APR      | <0.0001  | <u>17690000</u>             | <u>20066667</u>  | 6214500       |
| TMP      | <0.0001  | 105841667                   | <u>227133333</u> | 76101667      |
| FLO      | <0.0001  | 4685167                     | <u>5382667</u>   | 3872333       |
| FEN      | <0.0001  | 9363667                     | <u>61566667</u>  | 12395500      |
| DEX      | <0.0001  | 987733                      | <u>13883333</u>  | 954317        |
| PGT      | <0.0001  | 622033                      | <u>17616667</u>  | 847283        |
| AMO      | N.D.     |                             |                  |               |
| MPR      | 0.65     | 6857000                     | 8155000          | 7203333       |
| AAF      | <0.0001  | <u>16420000</u>             | 12336667         | 6132833       |
| CBM      | <0.0001  | 298783333                   | <u>558283333</u> | 290683333     |
| PPN      | <0.0001  | 1786767                     | <u>85060000</u>  | 2625083       |
| SPD      | N.D.     |                             |                  |               |
| MTN      | <0.0001  | <u>22173333</u>             | <u>19681667</u>  | 6227000       |
| AND      | N.D.     |                             |                  |               |
| NPX      | 0.68     | 41400000                    | 38228333         | 37266667      |
| CTM      | <0.0001  | 4125833                     | <u>192250000</u> | 7223333       |
| ERY      | <0.0001  | 146530                      | <u>6504333</u>   | 226628        |
| AAS      | 0.0020   | <u>591517</u>               | <u>515683</u>    | 211493        |
| NOR      | <0.0001  | <u>4478667</u>              | <u>3246833</u>   | 1401633       |

Supplementary data 4, continued.

| Analytes | p-value* | Mean value of peak areas ** |                  |               |
|----------|----------|-----------------------------|------------------|---------------|
|          |          | ODS                         | Alumina          | Alumina + ODS |
| BZQ      |          | N.D.                        |                  |               |
| ATV      | <0.0001  | 4320333                     | <u>16396667</u>  | 6805333       |
| ATN      | 0.00011  | <u>4645667</u>              | <u>4711667</u>   | 927833        |
| CAF      | <0.0001  | <u>125805000</u>            | <u>130178333</u> | 39703333      |
| ATZ      | <0.0001  | 236883333                   | <u>49316667</u>  | 240650000     |
| IOH      | <0.0001  | <u>519333</u>               | <u>621817</u>    | 255150        |
| DEET     | <0.0001  | 154116667                   | <u>447433333</u> | 153300000     |
| CIP      | 0.0034   | <u>17561667</u>             | <u>14670000</u>  | 8229000       |
| E2       |          | N.D.                        |                  |               |
| EE2      | 0.033    | <u>3542500</u>              | 2625167          | 2967667       |
| CRT      | <0.0001  | 26690000                    | <u>271433333</u> | 33895000      |
| E1       | <0.0001  | 2283667                     | <u>13670000</u>  | 2327000       |
| EPR      | 0.0030   | 2312667                     | <u>3504500</u>   | 2189333       |
| PPR      | <0.0001  | 1262667                     | <u>3080333</u>   | 1254900       |
| DCF      | 0.0029   | 1967667                     | <u>2807500</u>   | 1778333       |
| IBP      | 0.49     | 278167                      | 249667           | 244517        |
| ASC      | <0.0001  | <u>43305000</u>             | 33733333         | 19360000      |
| ACF      | 0.17     | 28141667                    | 26138333         | 22606667      |
| BPA      |          | N.D.                        |                  |               |
| TCS      |          | N.D.                        |                  |               |
| TOP      |          | N.D.                        |                  |               |
| NNF      |          | N.D.                        |                  |               |
| AHB      | <0.0001  | <u>51883333</u>             | 41675000         | 23108333      |
| GEM      | <0.0001  | 2606667                     | <u>9461833</u>   | 2789833       |

\*p<0.05 : there is significant difference after an ANOVA, the mean values are different.

\*\* In bold and underlined: most suitable adsorbents based on the highest responses obtained.

N.D.: Not detected.

**Supplementary data 5: Experimental design to screen the effect of 4 sample preparation factors, 1000 ng g<sup>-1</sup> of each CEC.**

| <b>Experiment</b> | <b>%Methanol</b> | <b>pH</b> | <b>Amount of alumina (g)</b> | <b>%EDTA</b> |
|-------------------|------------------|-----------|------------------------------|--------------|
| 1                 | 10               | 3         | 0.1                          | 0            |
| 2                 | 20               | 8         | 0.1                          | 0            |
| 3                 | 20               | 8         | 0.3                          | 0.4          |
| 4                 | 15               | 5.5       | 0.2                          | 0.2          |
| 5                 | 10               | 3         | 0.3                          | 0.4          |
| 6                 | 15               | 5.5       | 0.2                          | 0.2          |
| 7                 | 10               | 8         | 0.3                          | 0            |
| 8                 | 10               | 8         | 0.1                          | 0.4          |
| 9                 | 15               | 5.5       | 0.2                          | 0.2          |
| 10                | 20               | 3         | 0.1                          | 0.4          |
| 11                | 20               | 3         | 0.3                          | 0            |
| 12                | 10               | 3         | 0.1                          | 0            |
| 13                | 20               | 8         | 0.1                          | 0            |
| 14                | 20               | 8         | 0.3                          | 0.4          |
| 15                | 15               | 5.5       | 0.2                          | 0.2          |
| 16                | 10               | 3         | 0.3                          | 0.4          |
| 17                | 15               | 5.5       | 0.2                          | 0.2          |
| 18                | 10               | 8         | 0.3                          | 0            |
| 19                | 10               | 8         | 0.1                          | 0.4          |
| 20                | 15               | 5.5       | 0.2                          | 0.2          |
| 21                | 20               | 3         | 0.1                          | 0.4          |
| 22                | 20               | 3         | 0.3                          | 0            |

**Supplementary data 6: R<sup>2</sup> statistics and p-values of the sample preparation factors after carrying out the experimental design.**

|     | R <sup>2</sup> (%) | Factors      |            |                       |            | Interactions |            |            |
|-----|--------------------|--------------|------------|-----------------------|------------|--------------|------------|------------|
|     |                    | A: %Methanol | B: pH      | C: alumina amount (g) | D: %EDTA   | AB+CD        | AC+BD      | AD+BC      |
| PEN | 68                 | --           | 0.0007 (-) | --                    | --         | --           | --         | --         |
| OTC | 73                 | --           | --         | --                    | 0.0001 (+) | --           | --         | --         |
| DOX | 71                 | --           | --         | --                    | 0.0002 (+) | --           | --         | --         |
| TTC | 67                 | --           | --         | --                    | 0.0004 (+) | --           | --         | --         |
| MAR | 66                 | --           | --         | 0.0059 (-)            | --         | --           | 0.0055 (-) | --         |
| ENR | 73                 | --           | 0.0011 (-) | 0.025 (-)             | --         | --           | 0.012 (-)  | --         |
| DAN | 78                 | --           | 0.0001 (-) | 0.014 (-)             | --         | --           | --         | --         |
| SDZ | 32                 | --           | --         | --                    | --         | --           | --         | --         |
| STZ | 34                 | --           | --         | --                    | --         | --           | --         | --         |
| SMZ | 44                 | --           | --         | --                    | --         | --           | --         | --         |
| SDD | 64                 | --           | --         | --                    | --         | --           | --         | 0.042 (-)  |
| SMX | 84                 | --           | --         | 0.044 (+)             | 0.018 (+)  | --           | 0.033 (-)  | 0.037 (-)  |
| TYL | 22                 | --           | --         | --                    | --         | --           | --         | --         |
| TIA | 46                 | --           | --         | --                    | --         | --           | --         | --         |
| APR | 31                 | --           | --         | --                    | --         | --           | --         | --         |
| TMP | 56                 | --           | --         | --                    | --         | --           | --         | --         |
| FLO | 56                 | --           | 0.0070 (-) | --                    | --         | --           | --         | --         |
| FEN | 60                 | --           | --         | --                    | --         | --           | 0.026 (-)  | --         |
| DEX | 76                 | --           | --         | 0.025 (+)             | --         | --           | --         | 0.040 (-)  |
| PGT | 61                 | --           | 0.015 (-)  | --                    | --         | --           | --         | --         |
| MPR | 55                 | --           | 0.0079 (+) | --                    | --         | --           | --         | --         |
| AAF | 61                 | --           | --         | --                    | --         | --           | --         | --         |
| CBM | 36                 | --           | --         | --                    | --         | --           | --         | --         |
| PPN | 71                 | --           | 0.0001 (-) | --                    | --         | --           | --         | --         |
| MTN | 75                 | --           | 0.0033 (+) | --                    | --         | --           | --         | --         |
| NPX | 81                 | --           | 0.014 (-)  | 0.018 (+)             | --         | --           | --         | 0.0079 (-) |
| CTM | 67                 | --           | --         | --                    | --         | --           | 0.036 (-)  | --         |
| ERY | 78                 | --           | 0.015 (-)  | --                    | --         | --           | 0.043 (-)  | --         |
| AAS | 30                 | --           | --         | --                    | --         | --           | --         | --         |
| NOR | 77                 | --           | 0.0002 (-) | 0.011 (-)             | --         | --           | --         | --         |
| ATV | 72                 | --           | 0.0015 (+) | --                    | 0.035 (+)  | --           | 0.018 (-)  | --         |



**Supplementary data 6, continued.**

| Analytes    | R <sup>2</sup> (%) | Factors   |             |                                                 |           | Interactions |           |           |
|-------------|--------------------|-----------|-------------|-------------------------------------------------|-----------|--------------|-----------|-----------|
|             |                    | A: %MeOH  | B: pH       | C: Al <sub>2</sub> O <sub>3</sub><br>amount (g) | D: %EDTA  | AB+CD        | AC+BD     | AD+BC     |
| <b>ATN</b>  | 88                 | --        | <0.0001(+)  | --                                              | --        | --           | --        | --        |
| <b>CAF</b>  | 58                 | --        | 0.017 (+)   | --                                              | --        | --           | --        | --        |
| <b>ATZ</b>  | 20                 | --        | --          | --                                              | --        | --           | --        | --        |
| <b>IOH</b>  | 62                 | 0.044 (-) | --          | --                                              | --        | --           | --        | --        |
| <b>DEET</b> | 77                 | --        | 0.040 (+)   | --                                              | --        | --           | --        | --        |
| <b>CIP</b>  | 75                 | --        | 0.0005 (-)  | 0.013 (-)                                       | --        | --           | --        | --        |
| <b>EE2</b>  | 64                 | --        | 0.0052 (+)  | 0.028 (-)                                       | --        | --           | --        | --        |
| <b>CRT</b>  | 71                 | --        | --          | --                                              | --        | --           | --        | --        |
| <b>E1</b>   | 63                 | --        | --          | --                                              | --        | --           | --        | 0.044 (-) |
| <b>EPR</b>  | 51                 | --        | --          | --                                              | --        | --           | --        | --        |
| <b>PPR</b>  | 33                 | --        | --          | --                                              | --        | --           | --        | --        |
| <b>DCF</b>  | 44                 | --        | --          | --                                              | --        | --           | --        | --        |
| <b>IBP</b>  | 70                 | --        | --          | --                                              | --        | --           | --        | --        |
| <b>ASC</b>  | 85                 | --        | <0.0001 (-) | 0.016 (-)                                       | 0.041 (+) | --           | --        | 0.020 (+) |
| <b>ACF</b>  | 82                 | --        | 0.023 (-)   | 0.0023 (+)                                      | --        | --           | --        | 0.024 (-) |
| <b>AHB</b>  | 86                 | --        | <0.0001 (-) | 0.011 (-)                                       | 0.033 (+) | --           | 0.042 (-) | 0.015 (+) |
| <b>GEM</b>  | 74                 | --        | 0.026 (+)   | --                                              | --        | --           | 0.011 (-) | --        |

--: no significant effect (p value > 0.05)

(+): Positive effect

(-): Negative effect

Supplementary data 7: Diagram of dispersion showing the CECs whose optimum extraction pH is 3, and distribution according to their optimum alumina amount.

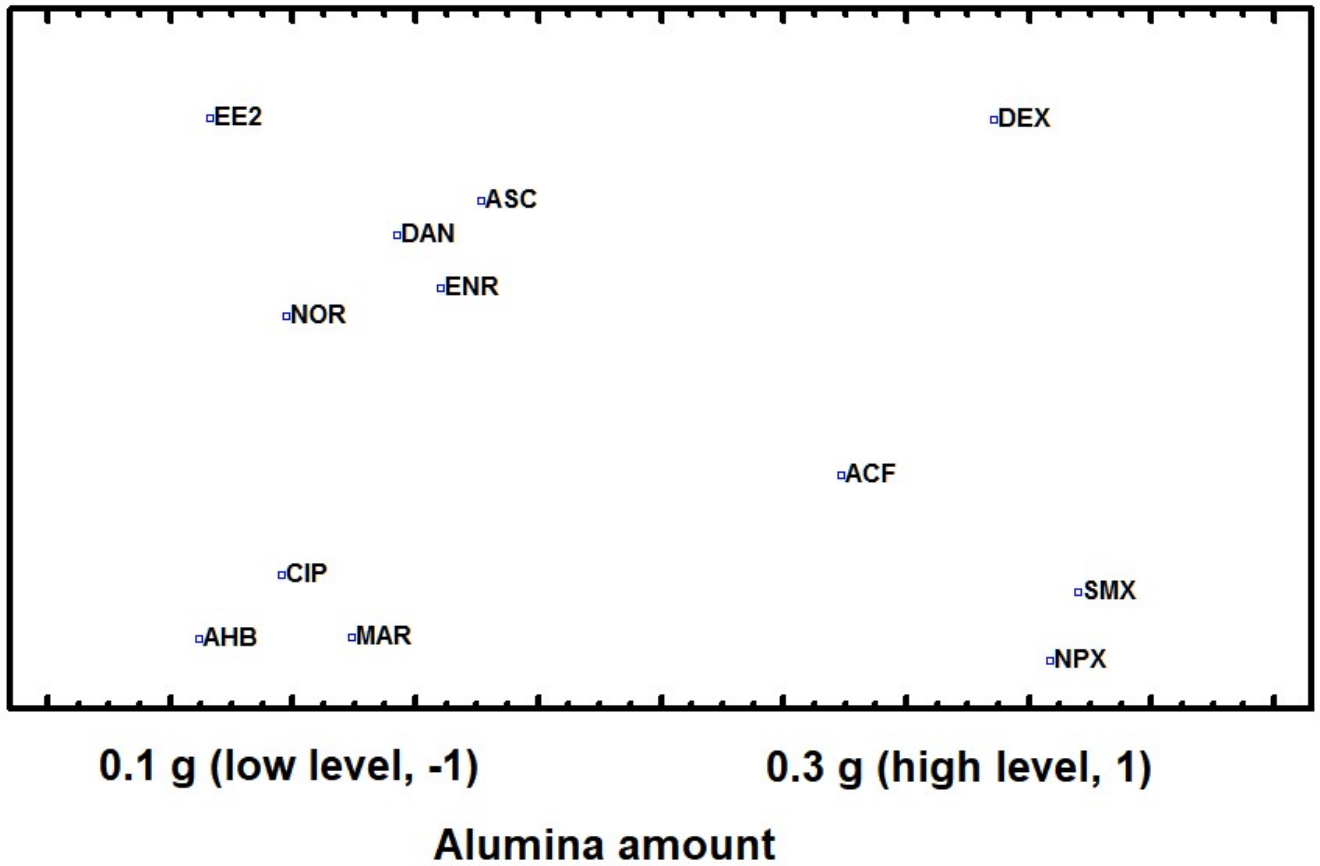

**Supplementary data 8: CECs and concentrations found in the RM sample used to validate the method after a standard addition calibration.**

| <b>Compound</b> | <b>Concentration<br/>(ng g<sup>-1</sup>)</b> |
|-----------------|----------------------------------------------|
| <b>PEN</b>      | --                                           |
| <b>OTC</b>      | 21                                           |
| <b>DOX</b>      | 1969                                         |
| <b>TTC</b>      | --                                           |
| <b>MAR</b>      | 128                                          |
| <b>ENR</b>      | 125                                          |
| <b>DAN</b>      | 47                                           |
| <b>SDZ</b>      | 16                                           |
| <b>STZ</b>      | --                                           |
| <b>SMZ</b>      | --                                           |
| <b>SDD</b>      | --                                           |
| <b>SMX</b>      | --                                           |
| <b>TYL</b>      | --                                           |
| <b>TIA</b>      | 84                                           |
| <b>APR</b>      | --                                           |
| <b>TMP</b>      | 310                                          |
| <b>FLO</b>      | 365                                          |
| <b>FEN</b>      | 43                                           |
| <b>DEX</b>      | 50                                           |
| <b>PGT</b>      | --                                           |
| <b>MPR</b>      | 72                                           |
| <b>AAF</b>      | 100                                          |
| <b>CBM</b>      | 15                                           |
| <b>PPN</b>      | 204                                          |

| <b>Compound</b> | <b>Concentration<br/>(ng g<sup>-1</sup>)</b> |
|-----------------|----------------------------------------------|
| <b>MTN</b>      | --                                           |
| <b>NPX</b>      | 104                                          |
| <b>CTM</b>      | --                                           |
| <b>ERY</b>      | --                                           |
| <b>AAS</b>      | --                                           |
| <b>NOR</b>      | --                                           |
| <b>ATV</b>      | --                                           |
| <b>ATN</b>      | --                                           |
| <b>CAF</b>      | 41                                           |
| <b>ATZ</b>      | --                                           |
| <b>IOH</b>      | --                                           |
| <b>DEET</b>     | 75                                           |
| <b>CIP</b>      | --                                           |
| <b>EE2</b>      | 3869                                         |
| <b>CRT</b>      | --                                           |
| <b>E1</b>       | --                                           |
| <b>EPR</b>      | --                                           |
| <b>PPR</b>      | --                                           |
| <b>DCF</b>      | 42                                           |
| <b>IBP</b>      | --                                           |
| <b>ASC</b>      | --                                           |
| <b>ACF</b>      | 183                                          |
| <b>AHB</b>      | 15906                                        |
| <b>GEM</b>      | --                                           |

-- : not detected

**Supplementary data 9: Validation parameters. Intermediate calibration levels; taking into account the total concentrations in raw manure sample: sum of the own and spiked concentrations. Each calibration standard was injected once.**

| Compound         | R <sup>2</sup> | Linear range (ng g <sup>-1</sup> ) | Additional calibration levels (ng g <sup>-1</sup> ) |      |      |      |      |      |      |      |
|------------------|----------------|------------------------------------|-----------------------------------------------------|------|------|------|------|------|------|------|
| Penicillin G     | 0.986          | 7-5137                             | 85                                                  | 173  | 331  | 696  | 1696 | 3443 |      |      |
| Oxytetracycline  | 0.978          | 29-4891                            | 94                                                  | 177  | 327  | 672  | 1619 | 3277 |      |      |
| Doxycycline      | 0.994          | 1977-6776                          | 1985                                                | 2049 | 2132 | 2278 | 2605 | 3554 | 5191 |      |
| Tetracycline     | 0.966          | 8-5127                             | 17                                                  | 85   | 173  | 330  | 694  | 1691 | 3435 |      |
| Marbofloxacin    | 0.970          | 137-7791                           | 244                                                 | 419  | 826  | 1938 | 3886 | 5773 |      |      |
| Enrofloxacin     | 0.996          | 135-7945                           | 205                                                 | 385  | 800  | 1935 | 3922 | 5848 |      |      |
| Danofloxacin     | 0.997          | 57-5770                            | 66                                                  | 142  | 240  | 416  | 822  | 1934 | 3882 |      |
| Sulfadiazine     | 0.989          | 25-7757                            | 35                                                  | 112  | 211  | 388  | 799  | 1923 | 3891 | 5797 |
| Sulfathiazole    | 0.988          | 9-7663                             | 19                                                  | 95   | 193  | 368  | 775  | 1888 | 2835 | 5722 |
| Sulfamethizole   | 0.958          | 9-7663                             | 19                                                  | 95   | 193  | 368  | 775  | 1888 | 2835 | 5722 |
| Sulfadimidine    | 0.972          | 10-7819                            | 19                                                  | 97   | 197  | 376  | 791  | 1926 | 3913 | 5839 |
| Sulfomethoxazole | 0.999          | 9-7663                             | 19                                                  | 95   | 193  | 368  | 775  | 1888 | 2835 | 5722 |
| Tylosin          | 0.954          | 8-6651                             | 16                                                  | 82   | 168  | 320  | 673  | 1639 | 3329 | 4967 |
| Tiamulin         | 0.960          | 92-1612                            | 100                                                 | 161  | 241  | 382  | 711  |      |      |      |
| Apramycin        | 0.963          | 9-5547                             | 18                                                  | 92   | 187  | 357  | 751  | 1829 | 3717 |      |
| Trimethoprim     | 0.986          | 319-8051                           | 328                                                 | 405  | 505  | 682  | 1092 | 2216 | 4183 | 6091 |
| Florphenicol     | 0.995          | 374-8170                           | 384                                                 | 461  | 561  | 740  | 1154 | 2287 | 4271 | 6193 |
| Fenbendazole     | 0.973          | 52-5765                            | 61                                                  | 137  | 236  | 411  | 818  | 1930 | 3877 |      |
| Dexamethasone    | 0.981          | 60-7713                            | 69                                                  | 145  | 243  | 419  | 825  | 1937 | 3885 | 5772 |

**Supplementary data 9, continued.**

| Compound             | R <sup>2</sup> | Linear range<br>(ng g <sup>-1</sup> ) | Additional calibration levels (ng g <sup>-1</sup> ) |      |     |     |     |      |      |      |
|----------------------|----------------|---------------------------------------|-----------------------------------------------------|------|-----|-----|-----|------|------|------|
|                      |                |                                       | 19                                                  | 96   | 195 | 372 | 783 | 1907 | 3874 |      |
| Progesterone         | 0.978          | 10-5781                               | 19                                                  | 96   | 195 | 372 | 783 | 1907 | 3874 |      |
| Methylparaben        | 0.995          | 81-7891                               | 91                                                  | 168  | 269 | 448 | 863 | 1998 | 3985 | 5911 |
| Acetaminophen        | 0.998          | 109-7841                              | 119                                                 | 195  | 295 | 472 | 883 | 2006 | 3973 | 5881 |
| Carbamazepine        | 0.983          | 24-390                                | 34                                                  | 111  | 211 |     |     |      |      |      |
| Propranolol          | 0.994          | 213-7060                              | 221                                                 | 289  | 377 | 534 | 898 | 1893 | 3635 | 5323 |
| Metronidazole        | 0.997          | 10-7741                               | 19                                                  | 96   | 195 | 372 | 783 | 1907 | 3874 | 5781 |
| Naproxen             | 0.995          | 113-7923                              | 123                                                 | 200  | 301 | 479 | 895 | 2030 | 4017 | 5943 |
| Clarithromycin       | 0.967          | 10-1905                               | 19                                                  | 95   | 195 | 372 | 782 |      |      |      |
| Erythromycin         | 0.998          | 9-7663                                | 19                                                  | 95   | 193 | 368 | 775 | 1888 | 2835 | 5722 |
| Acetylsalicylic acid | 0.946          | 1907-7741                             | 3874                                                | 5781 |     |     |     |      |      |      |
| Norfloxacin          | 0.974          | 9-7663                                | 19                                                  | 95   | 193 | 368 | 775 | 1888 | 2835 | 5722 |
| Atorvastatin         | 0.946          | 4-3612                                | 9                                                   | 45   | 91  | 174 | 365 | 890  | 1808 | 2697 |
| Atenolol             | 0.996          | 9-7663                                | 19                                                  | 95   | 193 | 368 | 775 | 1888 | 2835 | 5722 |
| Caffeine             | 0.989          | 51-7743                               | 60                                                  | 136  | 235 | 412 | 820 | 1938 | 3896 | 5793 |
| Atrazine             | 0.979          | 10-1918                               | 19                                                  | 96   | 196 | 374 | 788 |      |      |      |
| Iohexol              | 0.997          | 9-7624                                | 19                                                  | 94   | 192 | 366 | 771 | 1878 | 3816 | 5693 |
| DEET                 | 0.976          | 84-1963                               | 103                                                 | 202  | 377 | 784 |     |      |      |      |
| Ciprofloxacin        | 0.992          | 10-7780                               | 19                                                  | 96   | 196 | 374 | 787 | 1916 | 3894 | 5810 |

Supplementary data 9, continued.

| Compound                       | R <sup>2</sup> | Linear range<br>(ng g <sup>-1</sup> ) | Additional calibration levels (ng g <sup>-1</sup> ) |        |       |       |       |       |      |      |
|--------------------------------|----------------|---------------------------------------|-----------------------------------------------------|--------|-------|-------|-------|-------|------|------|
|                                |                |                                       |                                                     |        |       |       |       |       |      |      |
| 17- $\alpha$ -ethinylestradiol | 0.992          | 7704-11532                            | 8745                                                | 9591   | 10126 |       |       |       |      |      |
| Crotamiton                     | 0.998          | 9-365                                 | 19                                                  | 94     | 191   |       |       |       |      |      |
| Estrone                        | 0.939          | 195-7741                              | 372                                                 | 783    | 1907  | 3875  | 5781  |       |      |      |
| Ethylparaben                   | 0.986          | 10-7819                               | 19                                                  | 97     | 197   | 376   | 791   | 1926  | 3913 | 5839 |
| Propylparaben                  | 0.994          | 10-7819                               | 19                                                  | 97     | 197   | 376   | 791   | 1926  | 3913 | 5839 |
| Diclofenac                     | 0.991          | 51-7321                               | 60                                                  | 132    | 225   | 392   | 778   | 1835  | 3685 | 5478 |
| Ibuprofen                      | 0.991          | 193-7663                              | 368                                                 | 775    | 1887  | 3835  | 5722  |       |      |      |
| Salicylic acid                 | 0.908          | 1907-7741                             | 3874                                                | 5781   |       |       |       |       |      |      |
| Clofibric acid                 | 0.988          | 192-7768                              | 202                                                 | 277    | 374   | 547   | 950   | 2051  | 3979 | 5847 |
| 4-hydroxibenzoic acid          | 0.976          | 16001-23647                           | 16100                                               | 162778 | 16668 | 17812 | 19780 | 21686 |      |      |
| Gemfibrozil                    | 0.998          | 9-7663                                | 19                                                  | 95     | 193   | 368   | 775   | 1888  | 2835 | 5722 |

**Supplementary data 10: Superposition of extracted ion chromatograms. Most intense transitions for the CECs found in the raw manure sample used to validate the analytical method, spiked at 8000 ng g<sup>-1</sup>.**

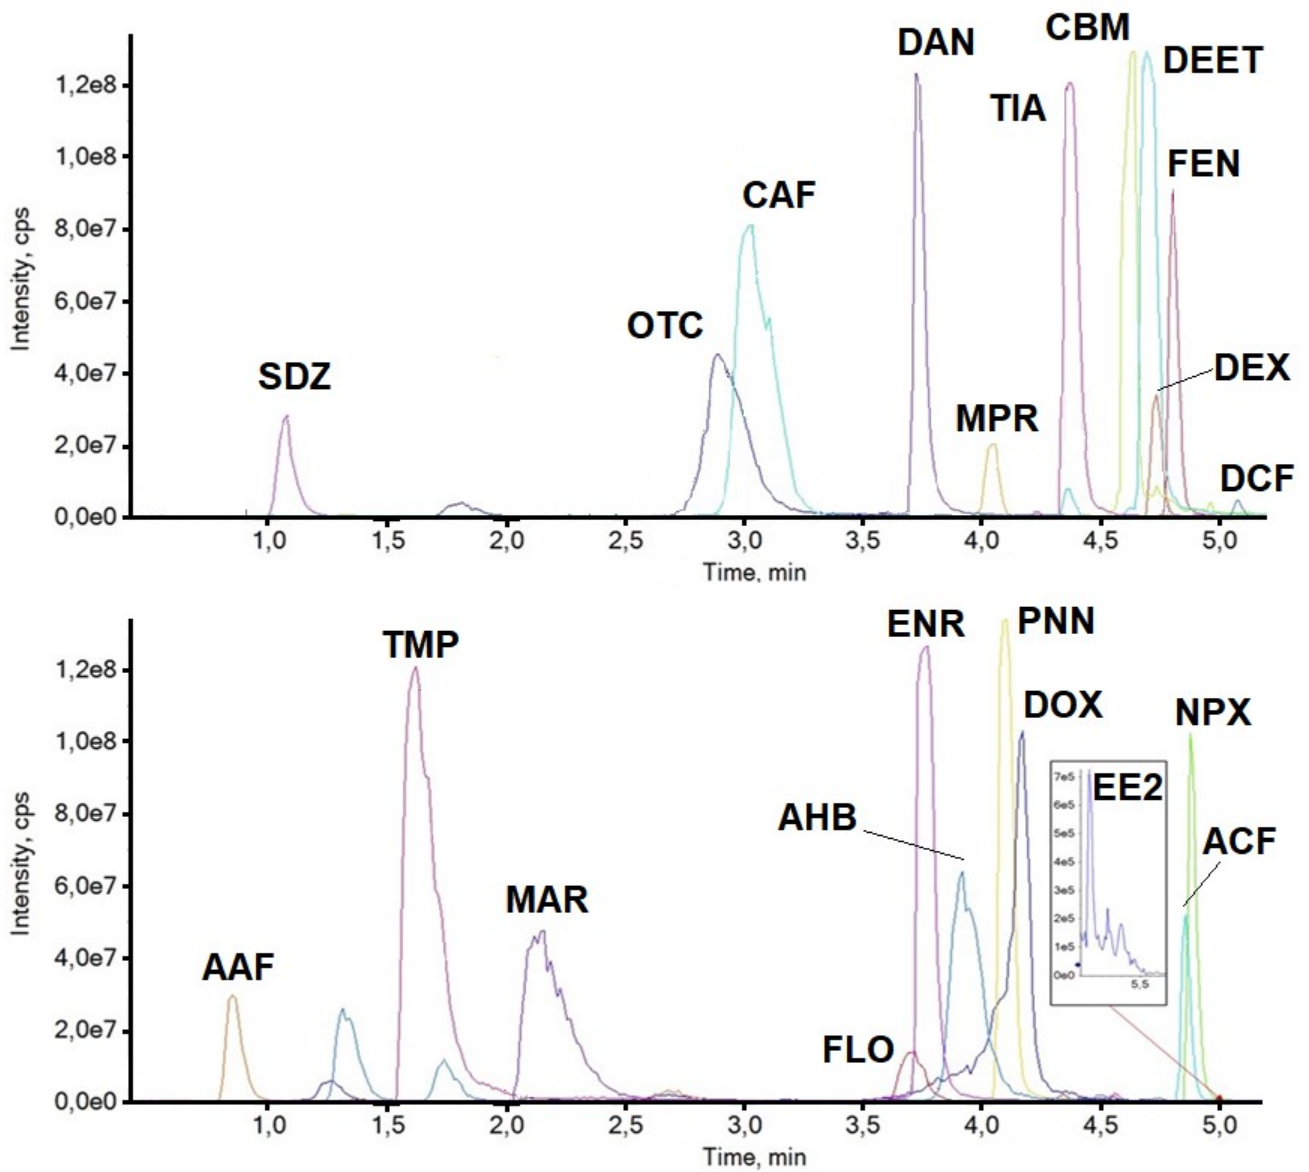

**Supplementary data 11: Superposition of extracted ion chromatograms. Most intense transitions for some CECs of a centrifuged raw manure sample, spiked at 1000 ng g<sup>-1</sup>.**

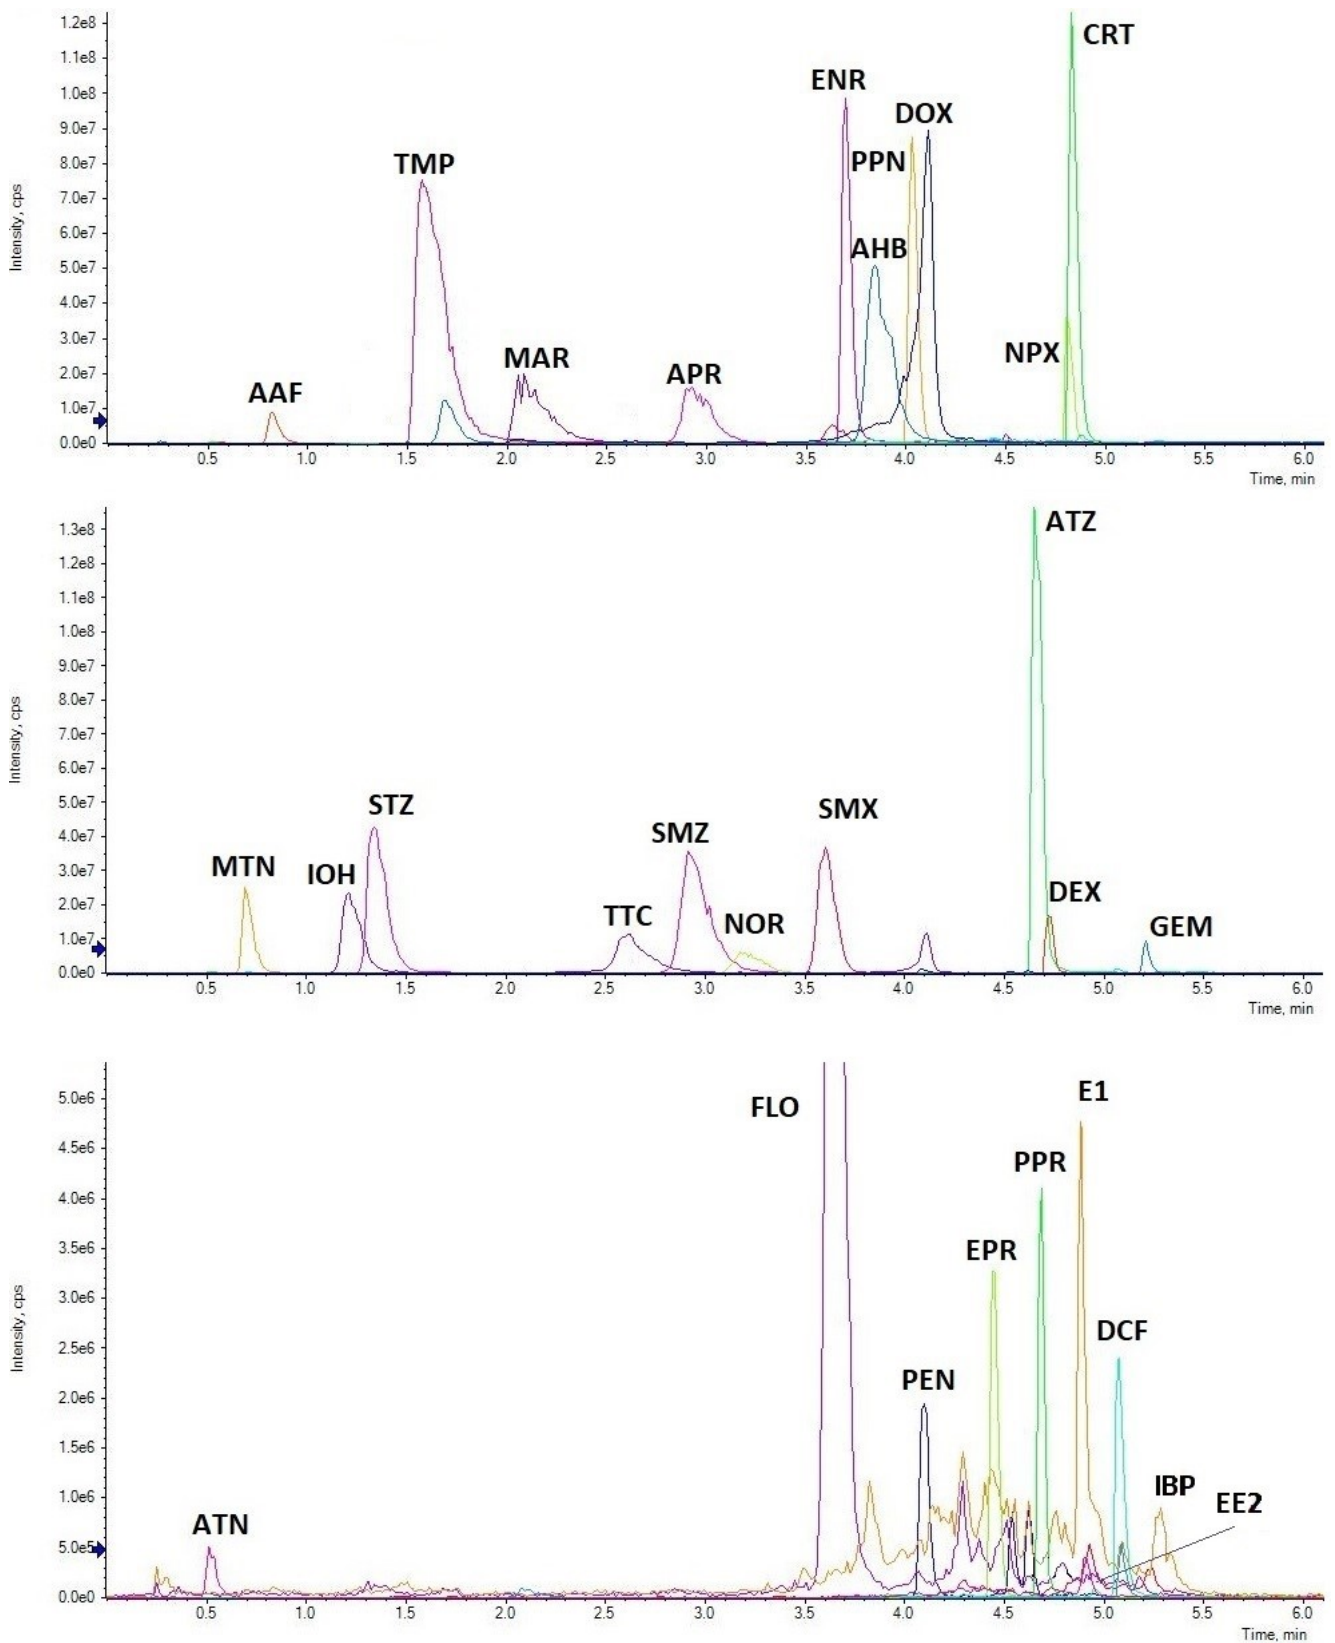



**Supplementary data 12: Extracted ion chromatograms for some compounds in low concentration.**

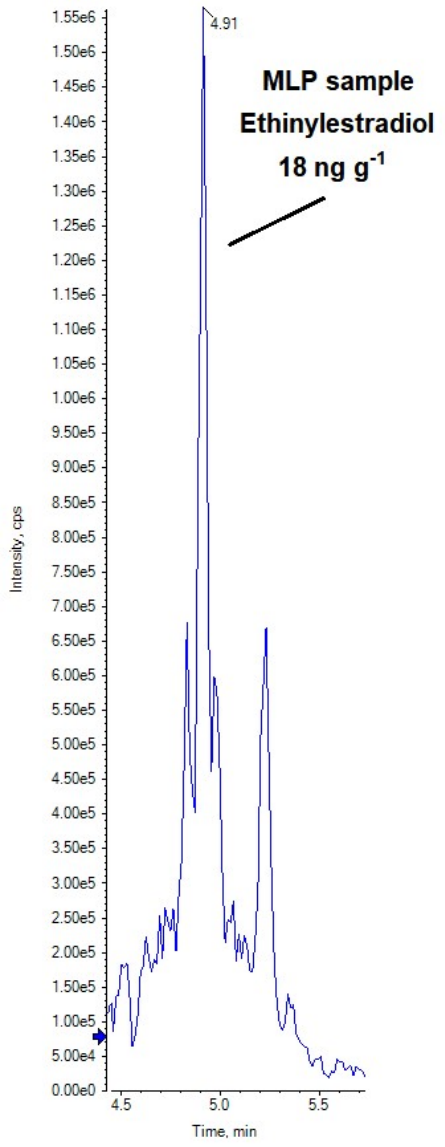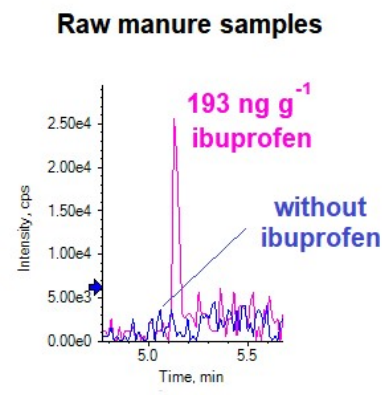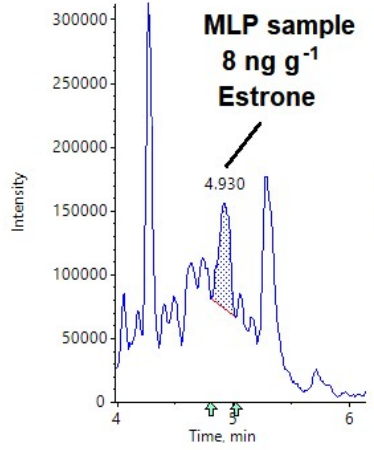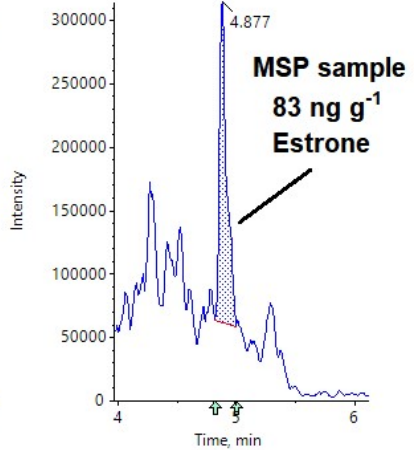

**Supplementary data 13: CECs and concentrations found in the analysis of two RM samples (uncentrifuged and centrifuged RM), and in the solid phase (MSP) and liquid phase (MLP) of each RM sample. Assays in duplicate.**

| Compound | Uncentrifuged manure           |                                |                                |                                |                               |                               | Centrifuged manure             |                                |                                |                                |                               |                               |
|----------|--------------------------------|--------------------------------|--------------------------------|--------------------------------|-------------------------------|-------------------------------|--------------------------------|--------------------------------|--------------------------------|--------------------------------|-------------------------------|-------------------------------|
|          | MSP 1<br>(ng g <sup>-1</sup> ) | MSP 2<br>(ng g <sup>-1</sup> ) | MLP 1<br>(ng g <sup>-1</sup> ) | MLP 2<br>(ng g <sup>-1</sup> ) | RM 1<br>(ng g <sup>-1</sup> ) | RM 2<br>(ng g <sup>-1</sup> ) | MSP 1<br>(ng g <sup>-1</sup> ) | MSP 2<br>(ng g <sup>-1</sup> ) | MLP 1<br>(ng g <sup>-1</sup> ) | MLP 2<br>(ng g <sup>-1</sup> ) | RM 1<br>(ng g <sup>-1</sup> ) | RM 2<br>(ng g <sup>-1</sup> ) |
| OTC      | 20                             | 37                             | 28                             | 18                             | 21                            | 35                            | 93                             | 117                            | 5                              | 4                              | 31                            | 11                            |
| DOX      | 75                             | 75                             | 34                             | 18                             | 748                           | 1434                          | 313                            | 470                            | 3                              | 16                             | 1996                          | 1942                          |
| MAR      | 121                            | 181                            | 70                             | 85                             | 188                           | 124                           | 434                            | 487                            | 32                             | 24                             | 130                           | 126                           |
| ENR      | 34                             | 28                             | 2                              | 0.1                            | 20                            | 27                            | 22                             | 23                             | 0.8                            | 0.7                            | 43                            | 9                             |
| DAN      | 118                            | 71                             | 1                              | 1                              | 47                            | 119                           | 14                             | 43                             | 0.5                            | 0.6                            | 91                            | 58                            |
| SDZ      | 10                             | 28                             | 11                             | 12                             | 65                            | 82                            | 24                             | 9                              | 14                             | 14                             | 89                            | 9                             |
| TIA      | -- (<0.03)                     | 5.7                            | 0.2                            | 0.5                            | 112                           | 2                             | 13                             | 13                             | 0.4                            | 0.3                            | 48                            | 48                            |
| TMP      | 3                              | 10                             | 1                              | 0.8                            | 24                            | 36                            | 8                              | 7                              | 0.1                            | 0.1                            | 40                            | 29                            |
| FLO      | 61                             | 42                             | 9                              | 14                             | 82                            | 72                            | -- (<0.1)                      | -- (<0.1)                      | -- (<0.3)                      | -- (<0.3)                      | -- (<3)                       | -- (<3)                       |
| PGT      | 95                             | 60                             | 74                             | 66                             | 44                            | 31                            | -- (<0.2)                      | -- (<0.2)                      | 17                             | 4                              | -- (<0.3)                     | -- (<0.3)                     |
| MPR      | 2                              | 14                             | -- (<0.19)                     | -- (<0.19)                     | 51                            | 107                           | 7                              | 9                              | 0.6                            | 0.6                            | 23                            | 17                            |
| AAF      | 19                             | 39                             | 5                              | 9                              | 70                            | 62                            | -- (<1)                        | -- (<1)                        | -- (<0.15)                     | -- (<0.15)                     | -- (<2)                       | -- (<2)                       |
| CBM      | -- (<1)                        | 4.7                            | 0.5                            | 0.3                            | 13                            | 5                             | 6                              | 5                              | 0.3                            | 0.4                            | 17                            | -- (<0.05)                    |
| PPN      | 24                             | 27                             | 2                              | 3                              | 31                            | 23                            | 52                             | 57                             | 1                              | 1                              | 22                            | 40                            |
| NPX      | 99                             | 83                             | 34                             | 4                              | 72                            | 72                            | -- (<2)                        | -- (<2)                        | -- (<0.5)                      | -- (<0.5)                      | -- (<3)                       | -- (<3)                       |
| CTM      | 9                              | 0.2                            | 0.7                            | -- (<0.1)                      | 31                            | 38                            | -- (<0.1)                      | -- (<0.1)                      | 0.6                            | 0.4                            | 0.3                           | 0.4                           |
| AAS      | -- (<41)                       | 384                            | 54                             | -- (<0.3)                      | >7741                         | >7741                         | -- (<41)                       | -- (<41)                       | -- (<0.3)                      | -- (<0.3)                      | -- (<193)                     | -- (<193)                     |
| ATV      | -- (<2.4)                      | -- (<2.4)                      | -- (<0.05)                     | -- (<0.05)                     | -- (<0.1)                     | -- (<0.1)                     | -- (<2.4)                      | 4                              | -- (<0.05)                     | 0.5                            | -- (<0.1)                     | -- (<0.1)                     |

Supplementary data 13, continued.

| Compound | Uncentrifuged manure           |                                |                                |                                |                               |                               | Centrifuged manure             |                                |                                |                                |                               |                               |
|----------|--------------------------------|--------------------------------|--------------------------------|--------------------------------|-------------------------------|-------------------------------|--------------------------------|--------------------------------|--------------------------------|--------------------------------|-------------------------------|-------------------------------|
|          | MSP 1<br>(ng g <sup>-1</sup> ) | MSP 2<br>(ng g <sup>-1</sup> ) | MLP 1<br>(ng g <sup>-1</sup> ) | MLP 2<br>(ng g <sup>-1</sup> ) | RM 1<br>(ng g <sup>-1</sup> ) | RM 2<br>(ng g <sup>-1</sup> ) | MSP 1<br>(ng g <sup>-1</sup> ) | MSP 2<br>(ng g <sup>-1</sup> ) | MLP 1<br>(ng g <sup>-1</sup> ) | MLP 2<br>(ng g <sup>-1</sup> ) | RM 1<br>(ng g <sup>-1</sup> ) | RM 2<br>(ng g <sup>-1</sup> ) |
| CAF      | 4                              | 3                              | 3                              | 1                              | 6                             | 15                            | 7                              | 7                              | 1                              | 1                              | 0.9                           | 2                             |
| DEET     | 2                              | 6                              | 0.7                            | 0.9                            | 4                             | 4                             | -- (<1)                        | -- (<1)                        | 0.7                            | 1                              | 5                             | 7                             |
| CIP      | 10                             | -- (<1.3)                      | 0.4                            | 0.3                            | -- (<0.4)                     | 24                            | 37                             | 64                             | 1                              | 0.6                            | 13                            | 6                             |
| EE2      | 197                            | 1191                           | 319                            | 102                            | 1974                          | 1932                          | 241                            | 342                            | 53                             | 18                             | 1625                          | 2086                          |
| CRT      | 6                              | 2                              | 0.8                            | 0.6                            | 17                            | 86                            | 0.4                            | 7                              | 0.3                            | 0.2                            | 13                            | 45                            |
| E1       | 83                             | 137                            | 24                             | 21                             | <764                          | <764                          | 146                            | 297                            | 8                              | 11                             | <764                          | <764                          |
| ASC      | 721                            | 518                            | 3                              | 12                             | 56382                         | 22767                         | 517                            | 704                            | 22                             | 28                             | 14905                         | 16305                         |
| ACF      | 5                              | 5                              | 4                              | 0.2                            | 14                            | 26                            | -- (<0.8)                      | -- (<0.8)                      | -- (<0.12)                     | -- (<0.12)                     | -- (<1)                       | -- (<1)                       |
| AHB      | 718                            | 666                            | 5                              | 10                             | >23647                        | 17.742                        | 591                            | 335                            | 12                             | 25                             | 15586                         | 16226                         |

--: not found. Detection limit is shown in parentheses.

Supplementary data 14: Percentage of removal of CECs in the farm centrifugation against the coefficient of partition of the CEC. The ionization state, according to  $pK_a$ , is shown with a number: without electric charge, 0; with positive charge, +1, with negative charge, -1; unknown state,  $\pm$ .

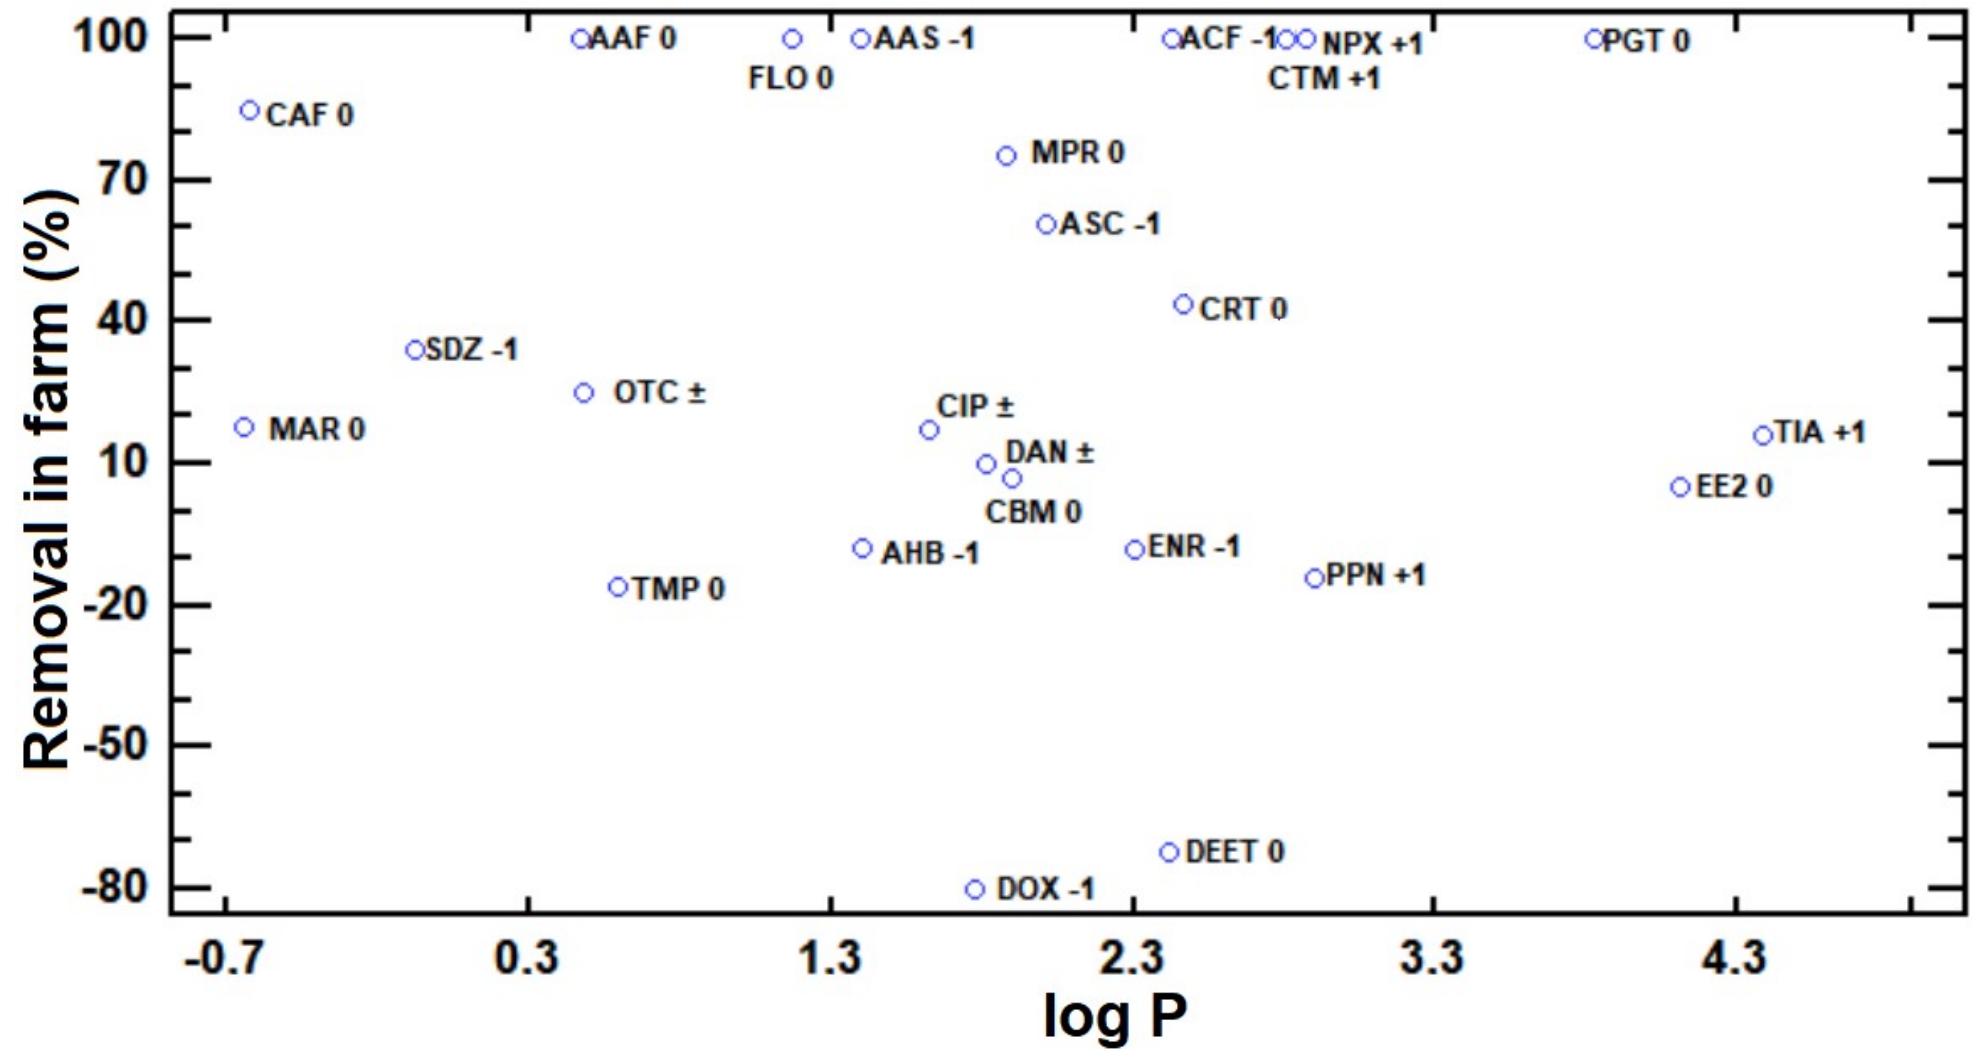

Supplement: d2em00323f1.pdf [file d2em00323f1.pdf]
